# Supplementary material for: Differentiating interstitial lung diseases from other respiratory diseases using electronic nose technology
Source: PubMed Central journal article supplement (PMC10626662; doi:10.1186/s12931-023-02575-3), 2023-11-06
Supplement: 12931_2023_2575_MOESM1_ESM.pdf [file 12931_2023_2575_MOESM1_ESM.pdf]

# Additional file 1

## Outlier analysis

**Figure S1:** Box-and-whisker plot of the first principal component resulting from breath profile comparison of patients with ILD and other chronic respiratory diagnosis.

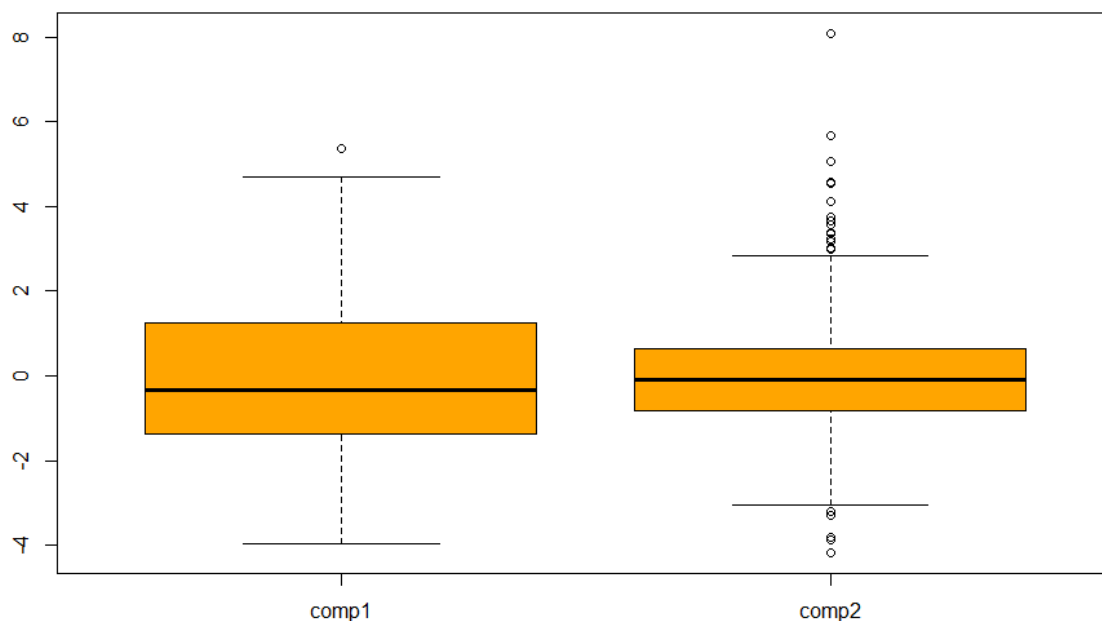

Principal component 1 (comp1) and 2 (comp2) result from the partial least squares analysis of breath profiles comparison of patients with ILD and other respiratory diseases. Outliers are marked as dots (n=25).

**Table S1:** Results of breath analysis comparison without outliers.

| Group 1 | n=  | Group 2                           | n= | Dataset  | AUC  | 95% CI    | Specificity | Sensitivity | Accuracy | NPV  | PPV  |
|---------|-----|-----------------------------------|----|----------|------|-----------|-------------|-------------|----------|------|------|
| ILD     | 101 | Asthma –<br>COPD –<br>Lung cancer | 98 | Training | 0.97 | 0.95-0.99 | 0.91        | 0.95        | 0.93     | 0.95 | 0.91 |
|         | 50  |                                   | 48 | Test     | 0.98 | 0.96-1.00 | 0.94        | 0.94        | 0.94     | 0.94 | 0.94 |

Results based on 2 principal components. AUC = area under the curve; CI = confidence interval; COPD = chronic obstructive pulmonary disease; ILD = interstitial lung disease.
